# Supplementary material
Source: PubMed Central journal article supplement (PMC2268557)

**A**

|                          |                                                                                     |                                                                                                                                                                         |                                                                                                                                                                         |                                                                                       |                                                                                         |   |   |
|--------------------------|-------------------------------------------------------------------------------------|-------------------------------------------------------------------------------------------------------------------------------------------------------------------------|-------------------------------------------------------------------------------------------------------------------------------------------------------------------------|---------------------------------------------------------------------------------------|-----------------------------------------------------------------------------------------|---|---|
| Binding site array       |  < | >   < | >   < | >  < | >  < |   |   |
| occupied sites           | 1                                                                                   | 1                                                                                                                                                                       | 1                                                                                                                                                                       | 1                                                                                     | 0                                                                                       | 1 | 0 |
| available for activation | 1                                                                                   | 0                                                                                                                                                                       | 0                                                                                                                                                                       | 0                                                                                     | 0                                                                                       | 1 | 0 |

**B**

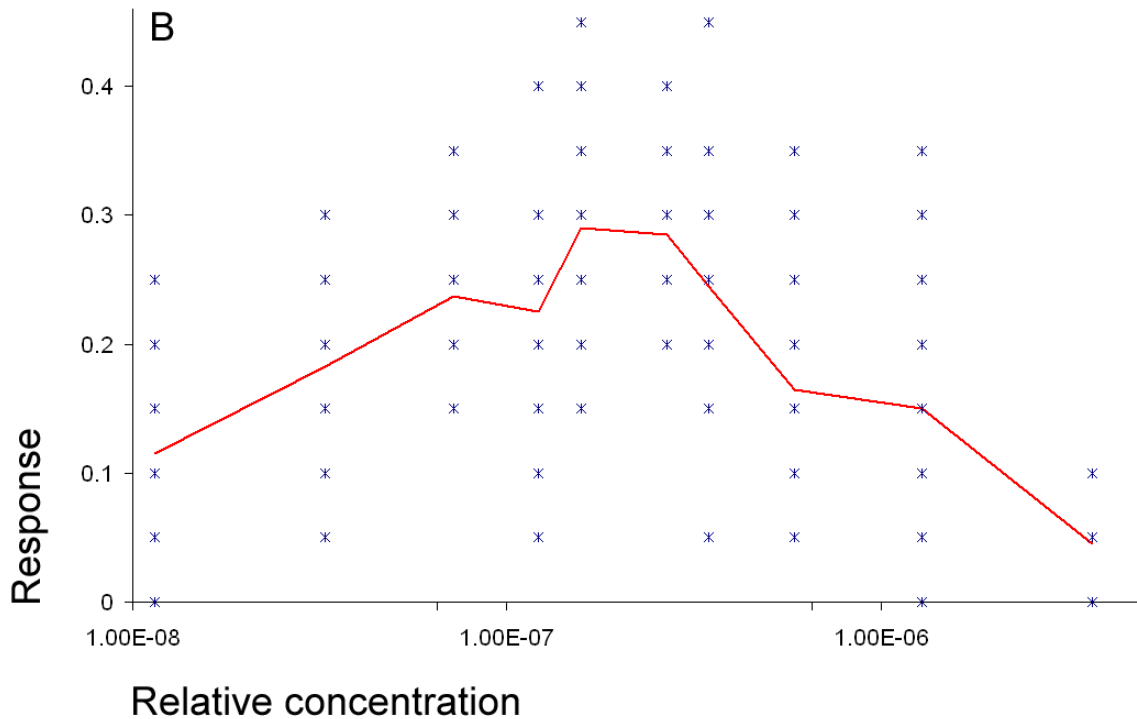

Supplement: pnas_0711941105_1.pdf [file pnas_0711941105_1.pdf]

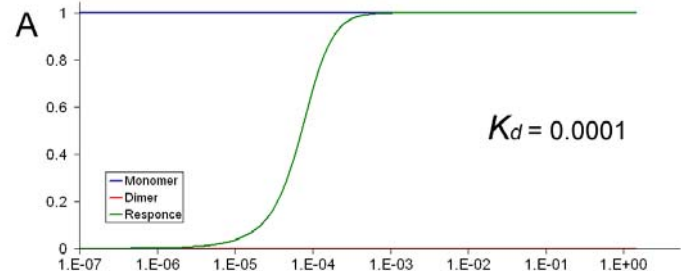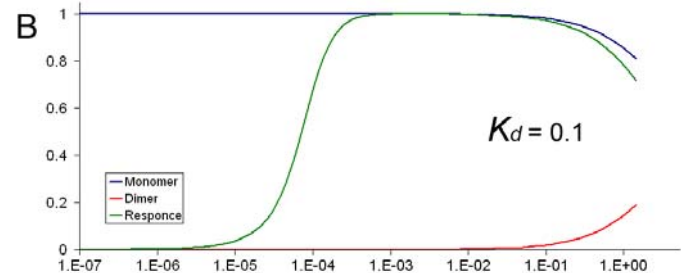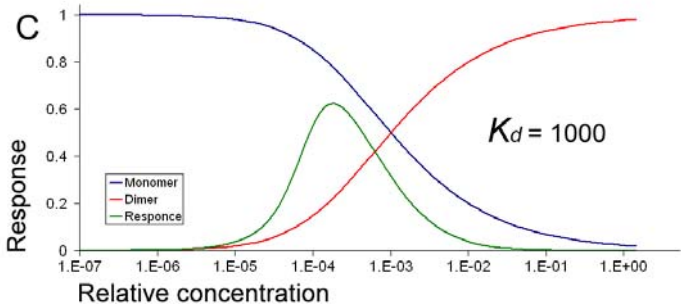

Supplement: pnas_0711941105_2.pdf [file pnas_0711941105_2.pdf]

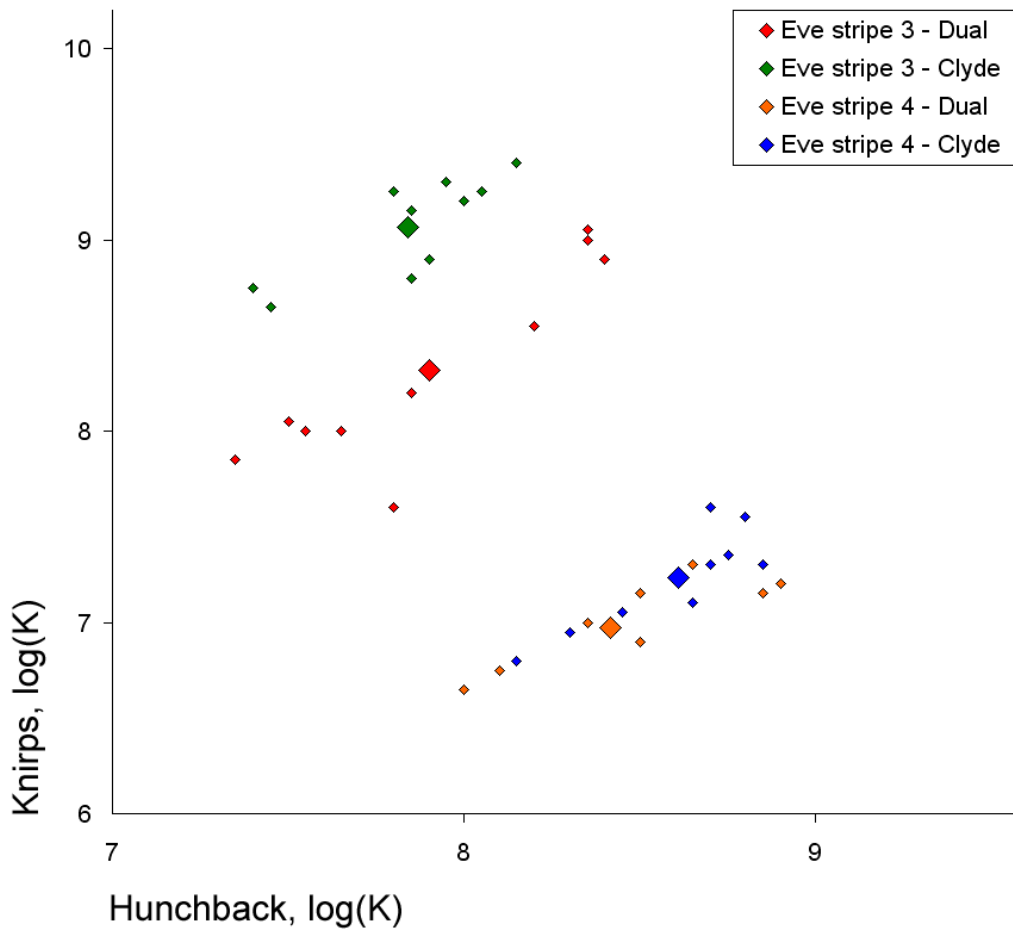

Supplement: pnas_0711941105_4.pdf [file pnas_0711941105_4.pdf]

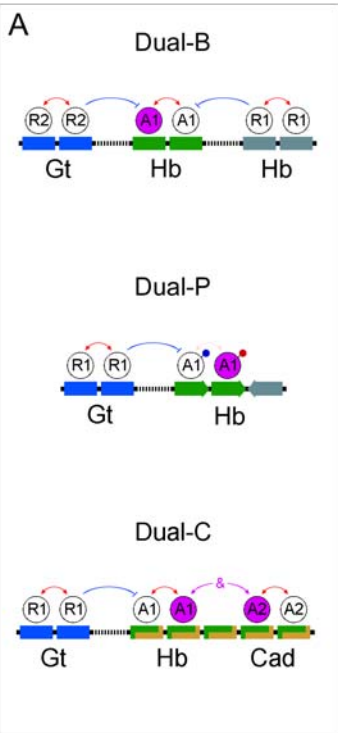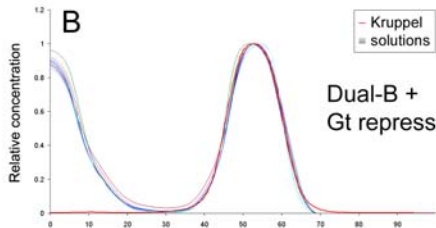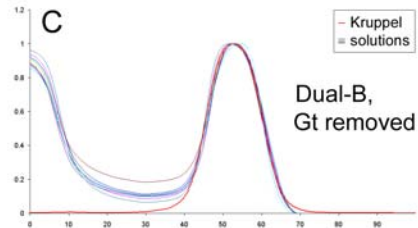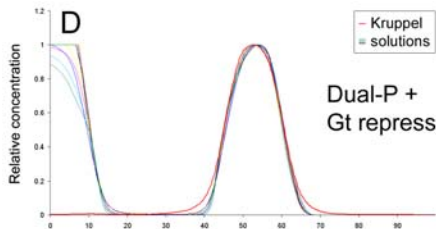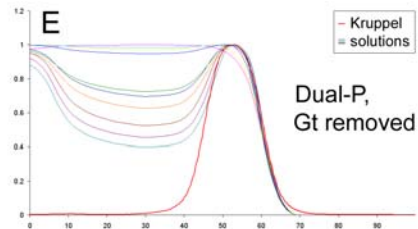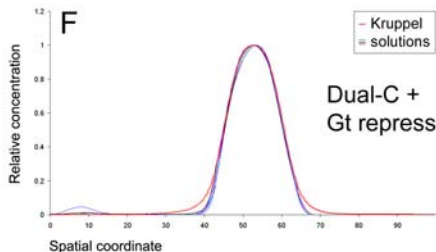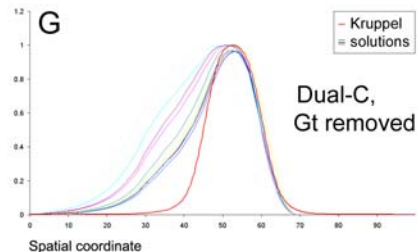

Supplement: pnas_0711941105_5.pdf [file pnas_0711941105_5.pdf]

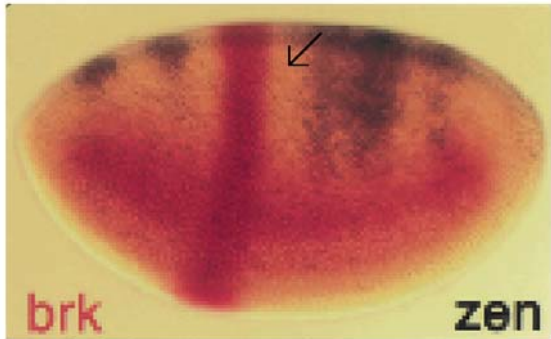

*eve2:brk*

Rushlow et al., Gen. Dev. 2001

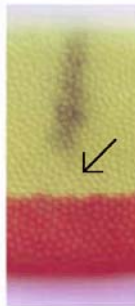

*sna:kni*

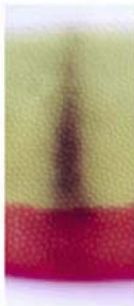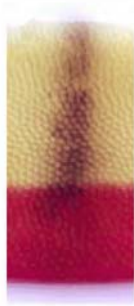

*sna:hb*

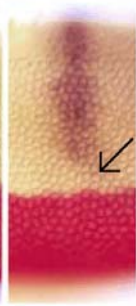

Clyde et al., Nature 2003

Supplement: pnas_0711941105_6.pdf [file pnas_0711941105_6.pdf]

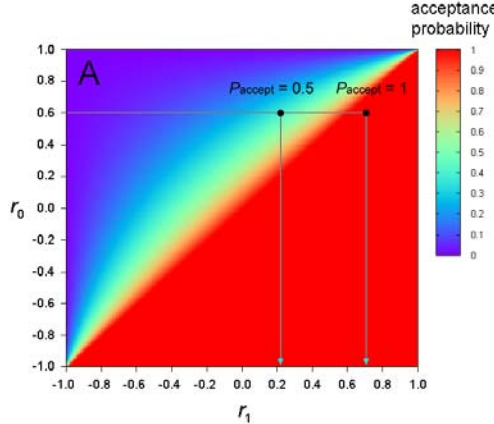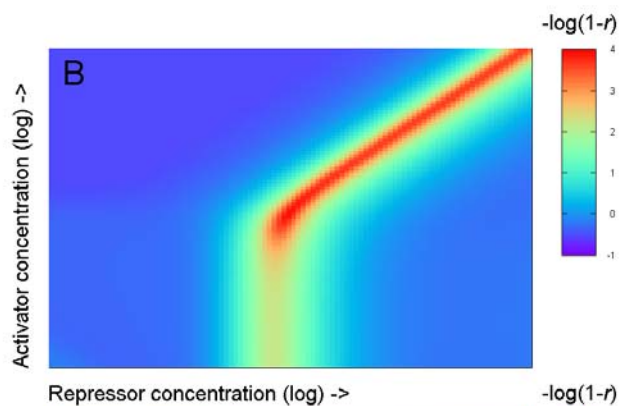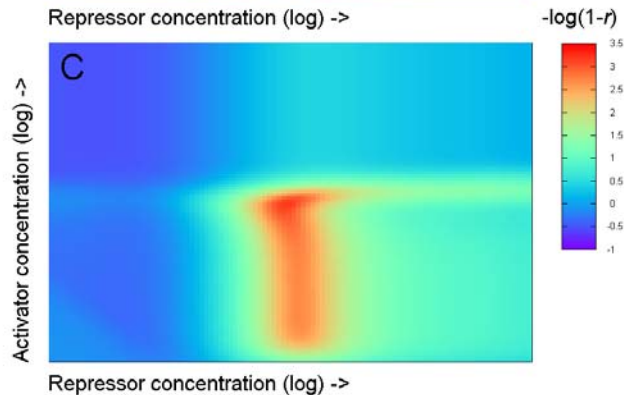

Supplement: pnas_0711941105_7.pdf [file pnas_0711941105_7.pdf]
